# Supplementary material
Source: MDPI journal article supplement (https://www.mdpi.com/2073-4441/9/2/90)
Supplement: s1 [file s1]

# Supplementary Materials: Annual Changes in Seasonal River Water Temperatures in the Eastern and Western United States

Tyler Wagner, Stephen R. Midway, Joanna B. Whittier, Jefferson T. DeWeber and Craig P. Paukert

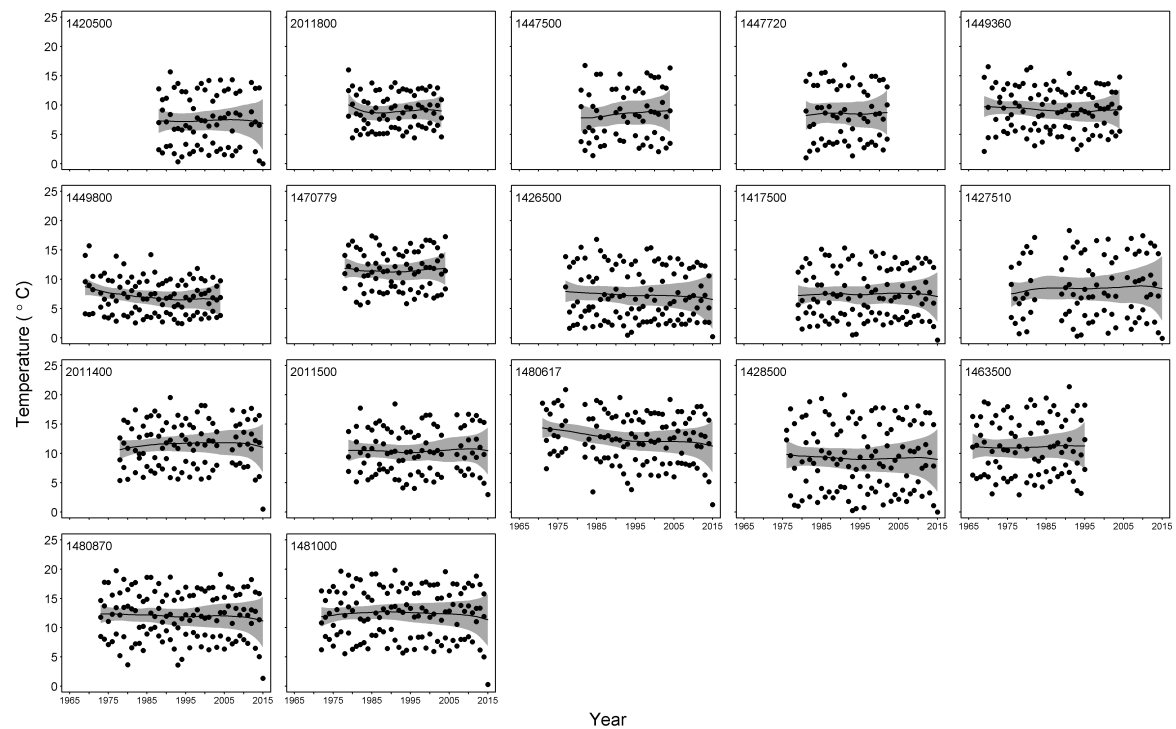

**Figure S1.** Temporal trends in spring river water temperature for sites located in the eastern U.S. (see Figure 1 for site map). Solid circles are observed data, solid lines are posterior mean fitted lines, and shaded areas are 95% credible regions. Numeric code on each panel corresponds to the U.S. Geological Survey gage ID.

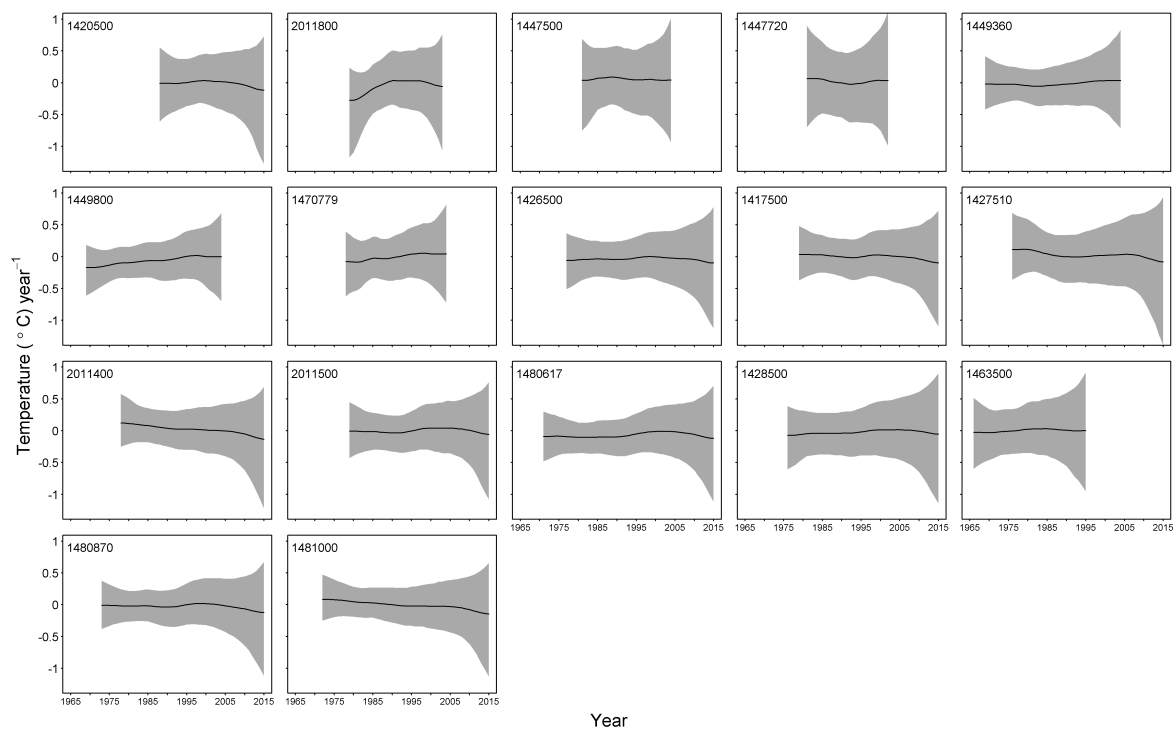

**Figure S2.** Annual rates of change in spring river water temperature for sites located in the eastern U.S. (see Figure 1 for site map). Solid solid lines are posterior means and shaded areas are 95% credible regions. Numeric code on each panel corresponds to the U.S. Geological Survey gage ID.

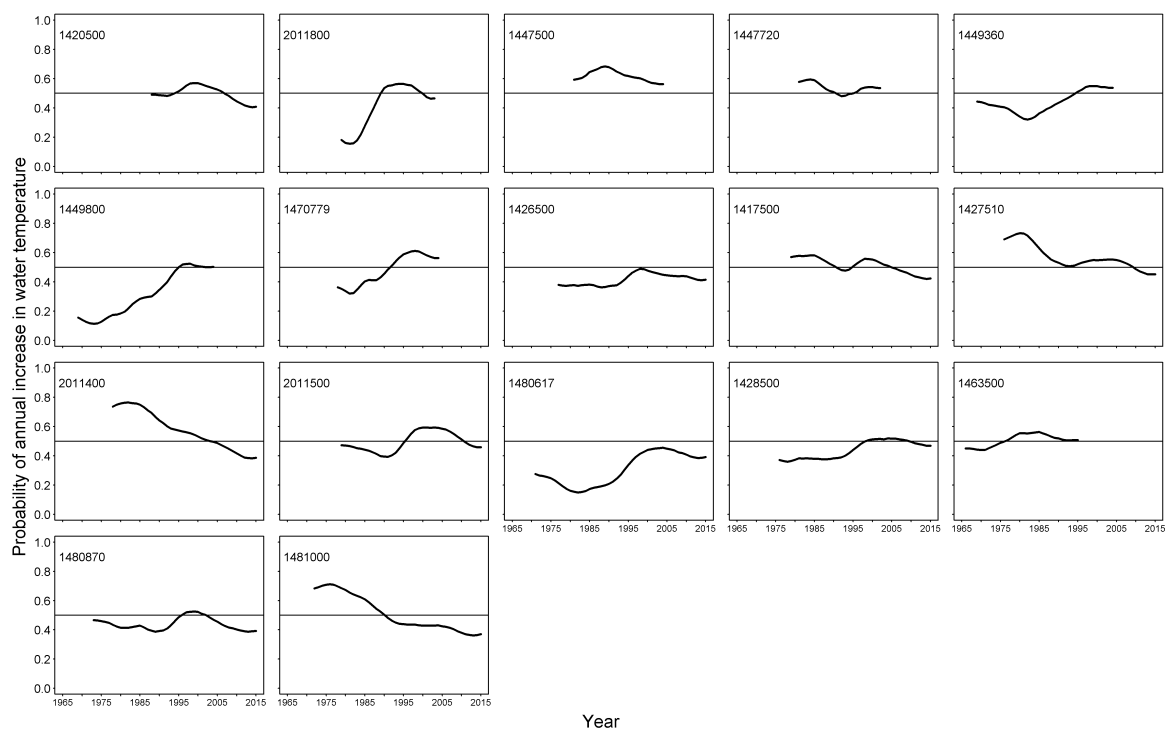

**Figure S3.** Annual probabilities of an increase in spring river water temperature for sites located in the eastern U.S. (see Figure 1 for site map). Numeric code on each panel corresponds to the U.S. Geological Survey gage ID. Horizontal line at probability = 0.5 is provided for reference.

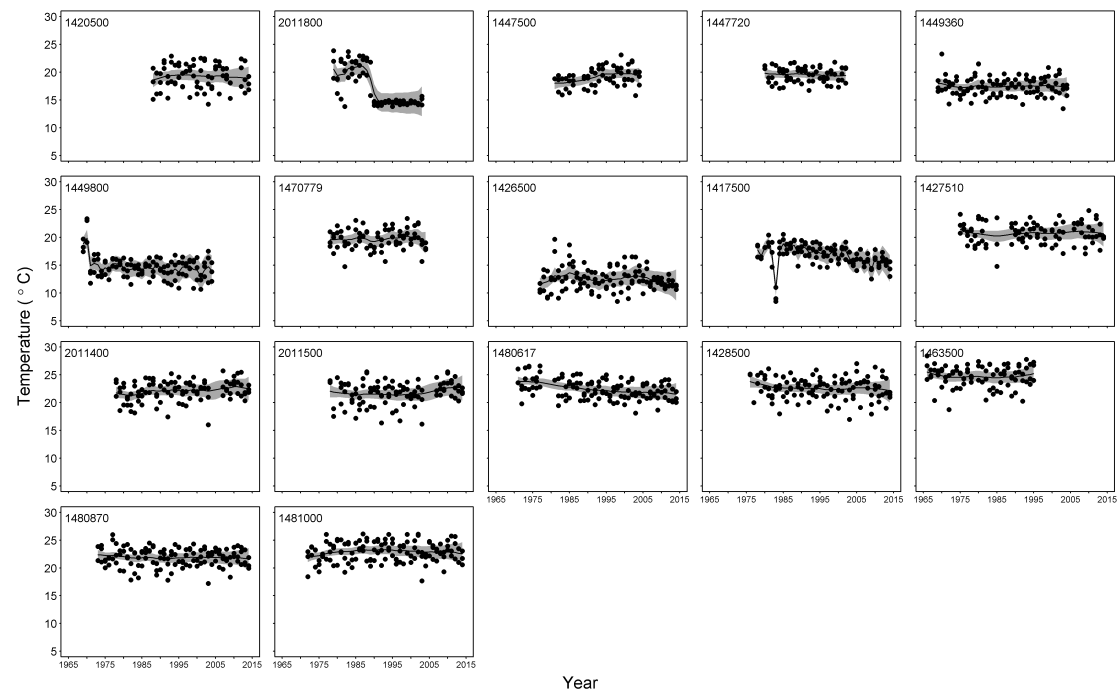

**Figure S4.** Temporal trends in summer river water temperature for sites located in the eastern U.S. (see Figure 1 for site map). Solid circles are observed data, solid lines are posterior mean fitted lines, and shaded areas are 95% credible regions. Numeric code on each panel corresponds to the U.S. Geological Survey gage ID. Note: Gage 2011800 was located below a dam and although we took steps to minimize the effects of changes in water management policies on trend detection, the step-change behavior in temperature may reflect changes in dam operations.

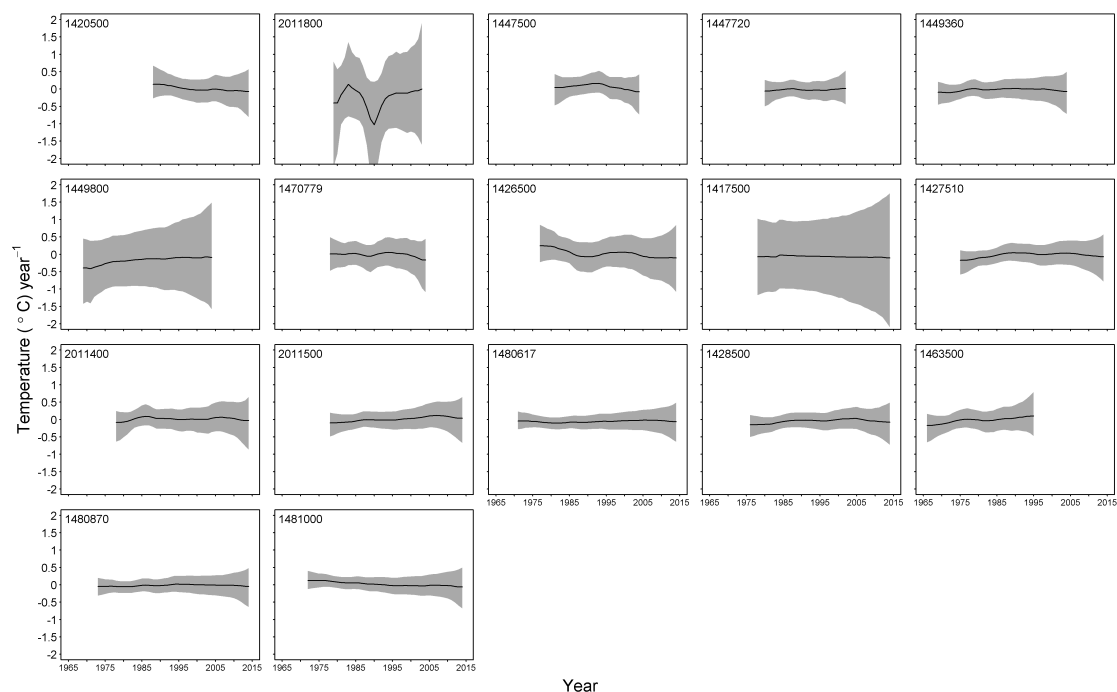

**Figure S5.** Annual rates of change in summer river water temperature for sites located in the eastern U.S. (see Figure 1 for site map). Solid solid lines are posterior means and shaded areas are 95% credible regions. Numeric code on each panel corresponds to the U.S. Geological Survey gage ID.

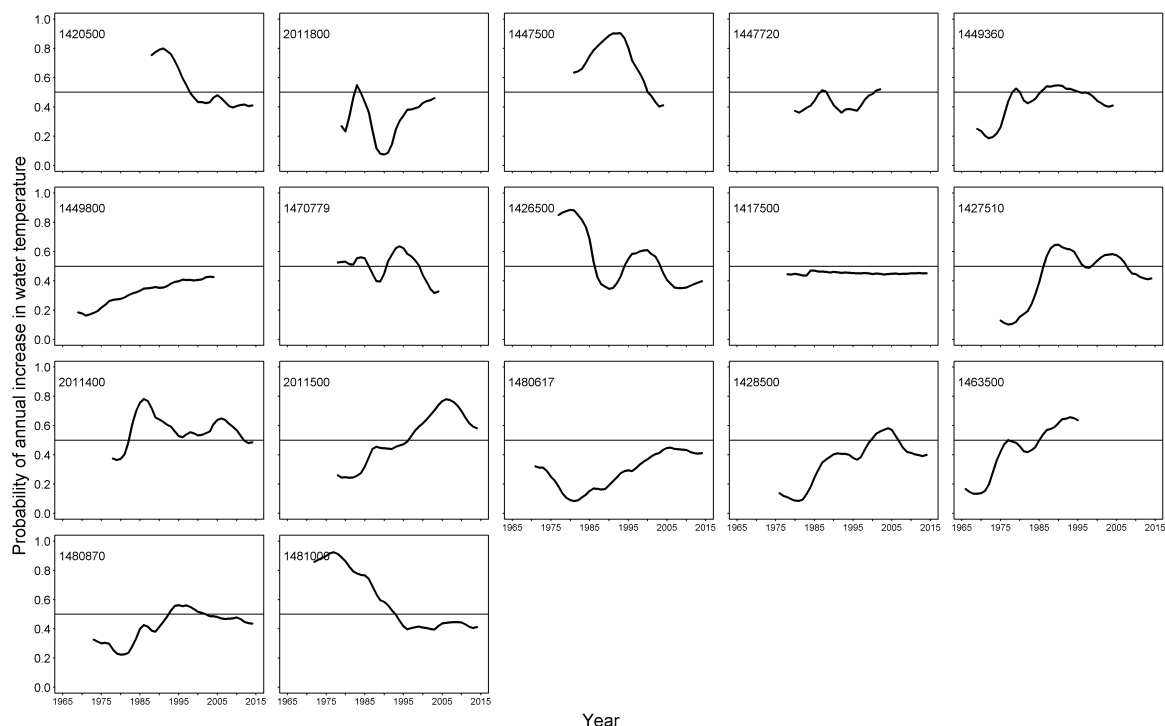

**Figure S6.** Annual probabilities of an increase in summer river water temperature for sites located in the eastern U.S. (see Figure 1 for site map). Numeric code on each panel corresponds to the U.S. Geological Survey gage ID. Horizontal line at probability = 0.5 is provided for reference.

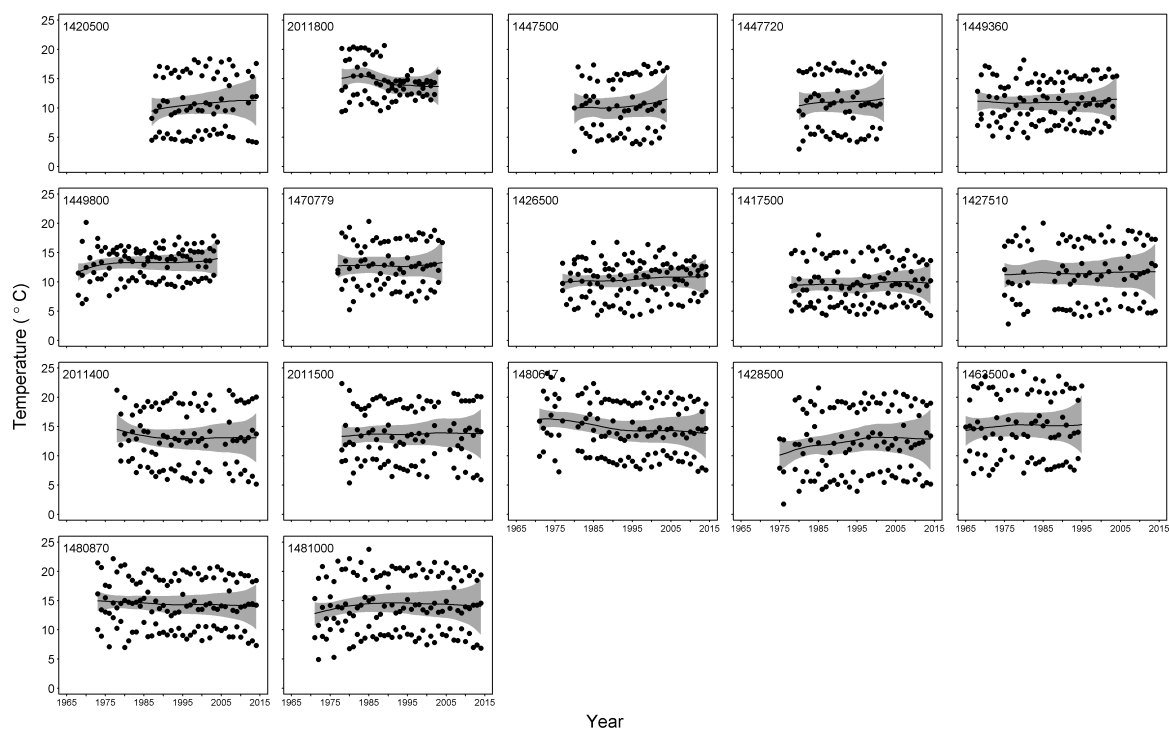

**Figure S7.** Temporal trends in fall river water temperature for sites located in the eastern U.S. (see Figure 1 for site map). Solid circles are observed data, solid lines are posterior mean fitted lines, and shaded areas are 95% credible regions. Numeric code on each panel corresponds to the U.S. Geological Survey gage ID.

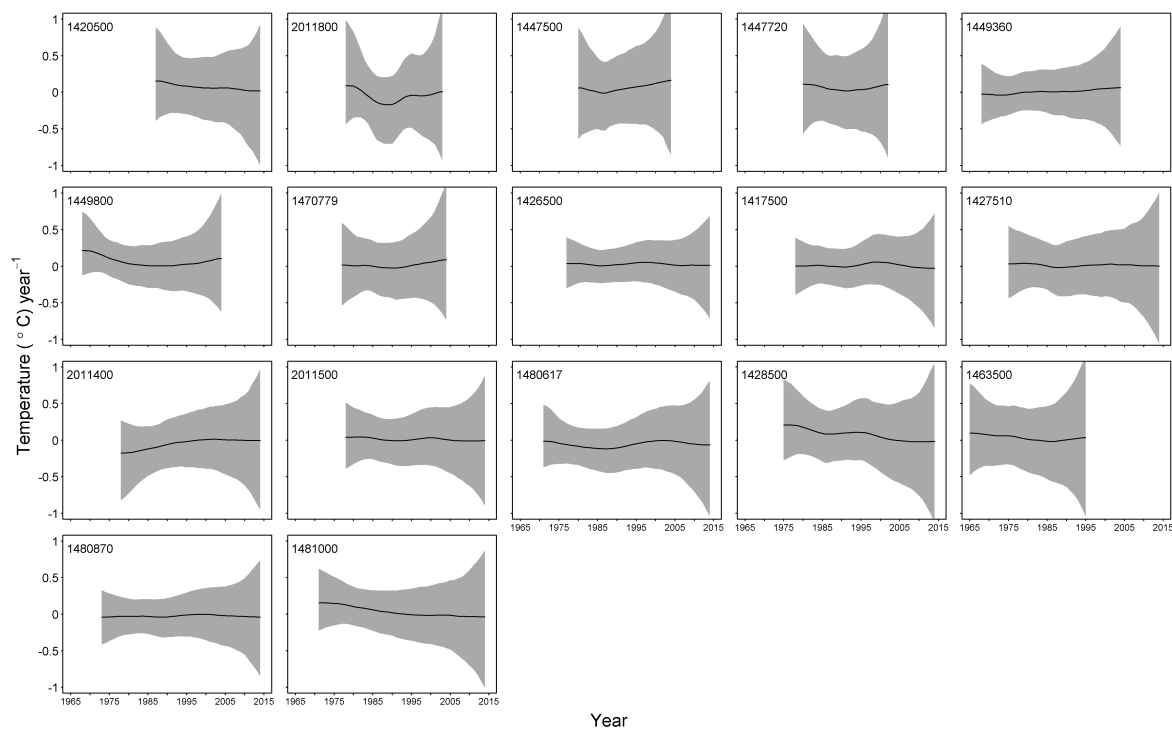

**Figure S8.** Annual rates of change in fall river water temperature for sites located in the eastern U.S. (see Figure 1 for site map). Solid solid lines are posterior means and shaded areas are 95% credible regions. Numeric code on each panel corresponds to the U.S. Geological Survey gage ID.

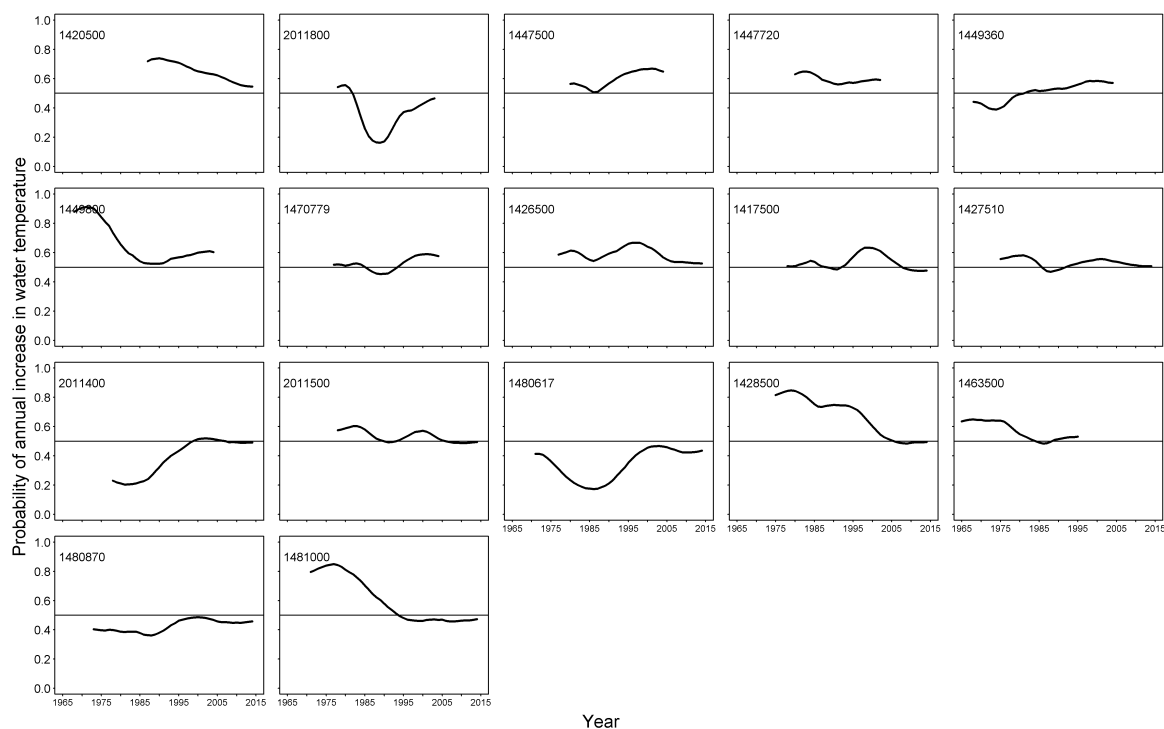

**Figure S9.** Annual probabilities of an increase in fall river water temperature for sites located in the eastern U.S. (see Figure 1 for site map). Numeric code on each panel corresponds to the U.S. Geological Survey gage ID. Horizontal line at probability = 0.5 is provided for reference.

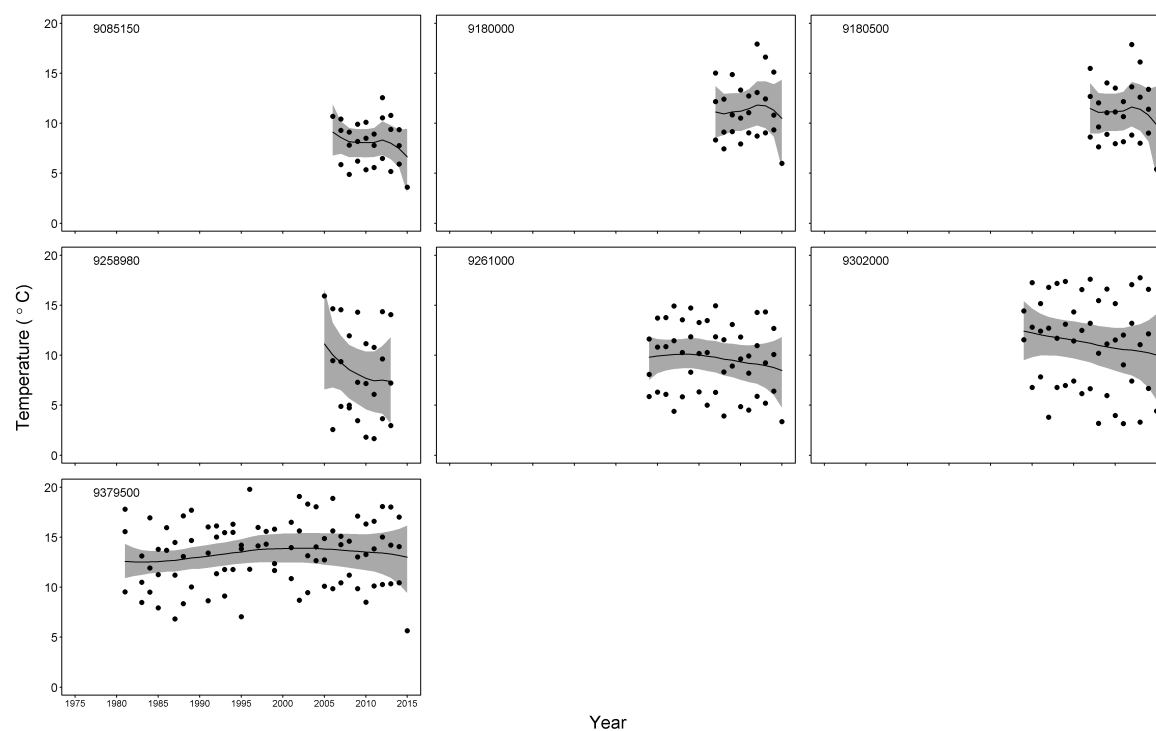

**Figure S10.** Temporal trends in spring river water temperature for sites located in the Upper Colorado River Basin (see Figure 1 for site map). Solid circles are observed data, solid lines are posterior mean fitted lines, and shaded areas are 95% credible regions. Numeric code on each panel corresponds to the U.S. Geological Survey gage ID.

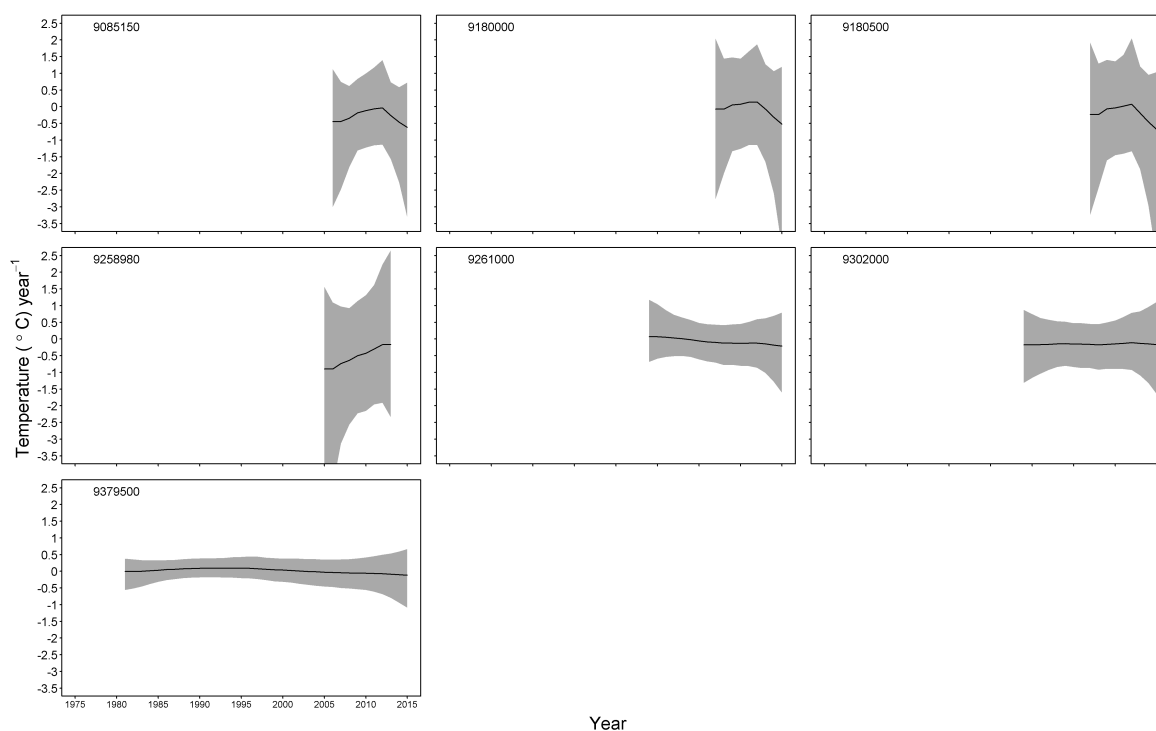

**Figure S11.** Annual rates of change in spring river water temperature for sites located in the Upper Colorado River Basin (see Figure 1 for site map). Solid solid lines are posterior means and shaded areas are 95% credible regions. Numeric code on each panel corresponds to the U.S. Geological Survey gage ID.

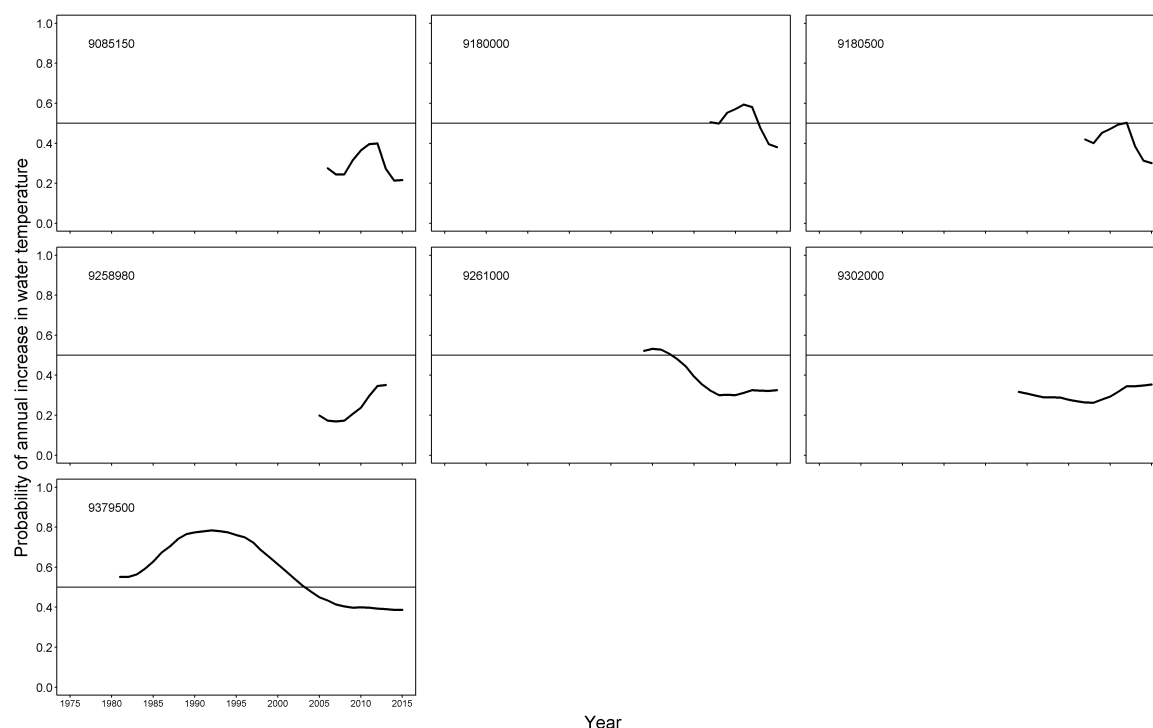

**Figure S12.** Annual probabilities of an increase in spring river water temperature for sites located in the Upper Colorado River Basin (see Figure 1 for site map). Numeric code on each panel corresponds to the U.S. Geological Survey gage ID. Horizontal line at probability = 0.5 is provided for reference.

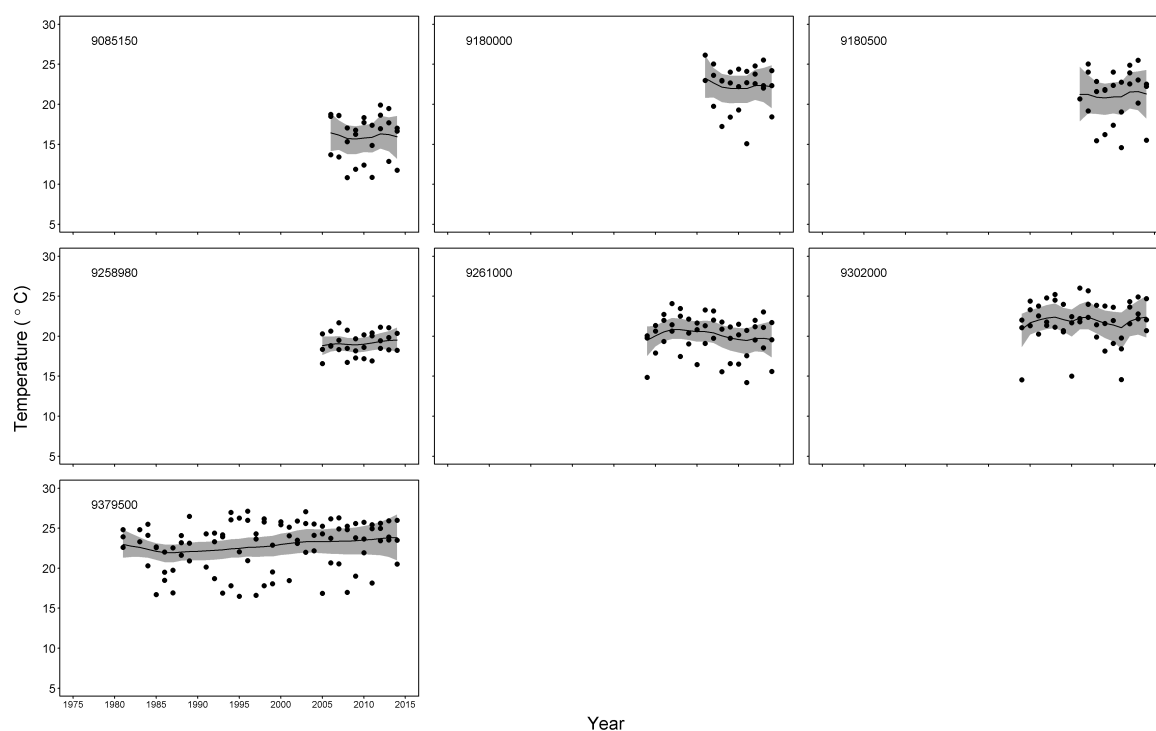

**Figure S13.** Temporal trends in summer river water temperature for sites located in the Upper Colorado River Basin (see Figure 1 for site map). Solid circles are observed data, solid lines are posterior mean fitted lines, and shaded areas are 95% credible regions. Numeric code on each panel corresponds to the U.S. Geological Survey gage ID.

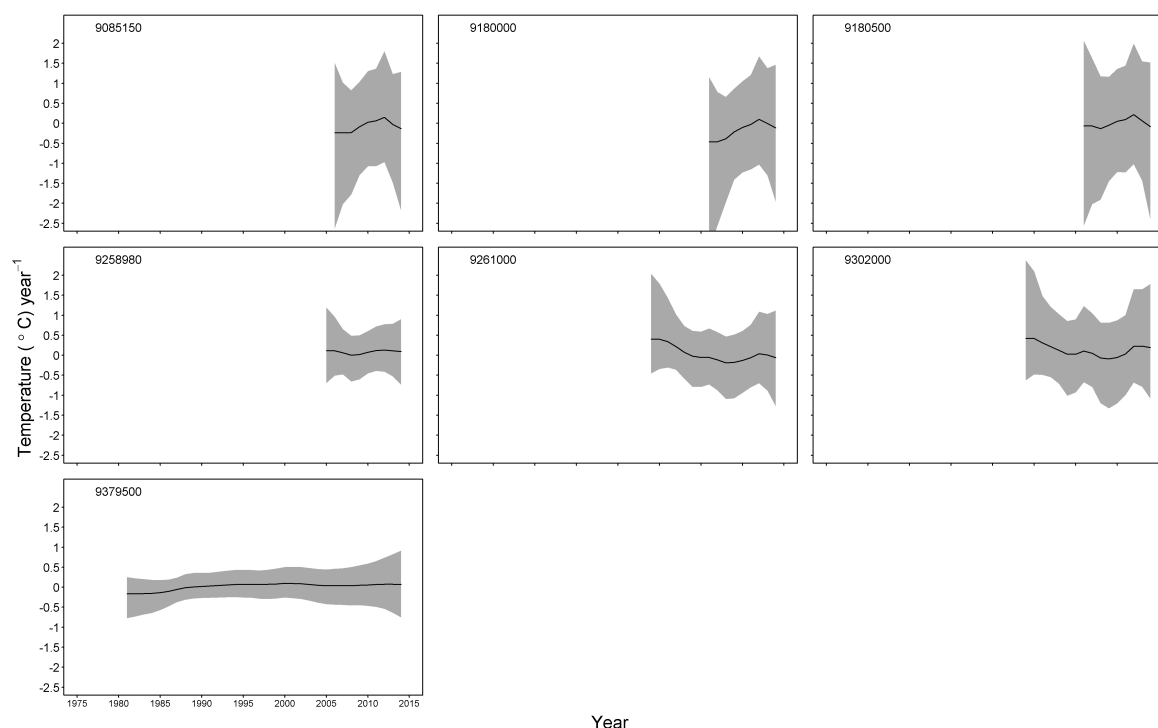

**Figure S14.** Annual rates of change in summer river water temperature for sites located in the Upper Colorado River Basin (see Figure 1 for site map). Solid solid lines are posterior means and shaded areas are 95% credible regions. Numeric code on each panel corresponds to the U.S. Geological Survey gage ID.

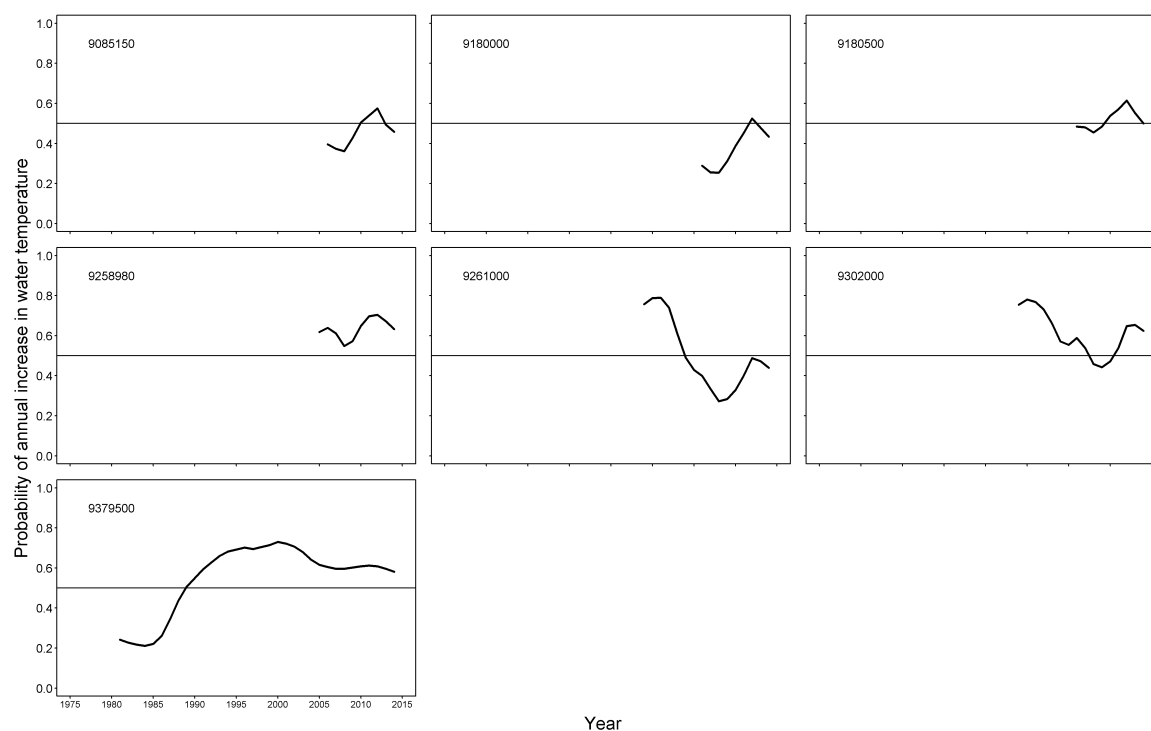

**Figure S15.** Annual probabilities of an increase in summer river water temperature for sites located in the Upper Colorado River Basin (see Figure 1 for site map). Numeric code on each panel corresponds to the U.S. Geological Survey gage ID. Horizontal line at probability = 0.5 is provided for reference.



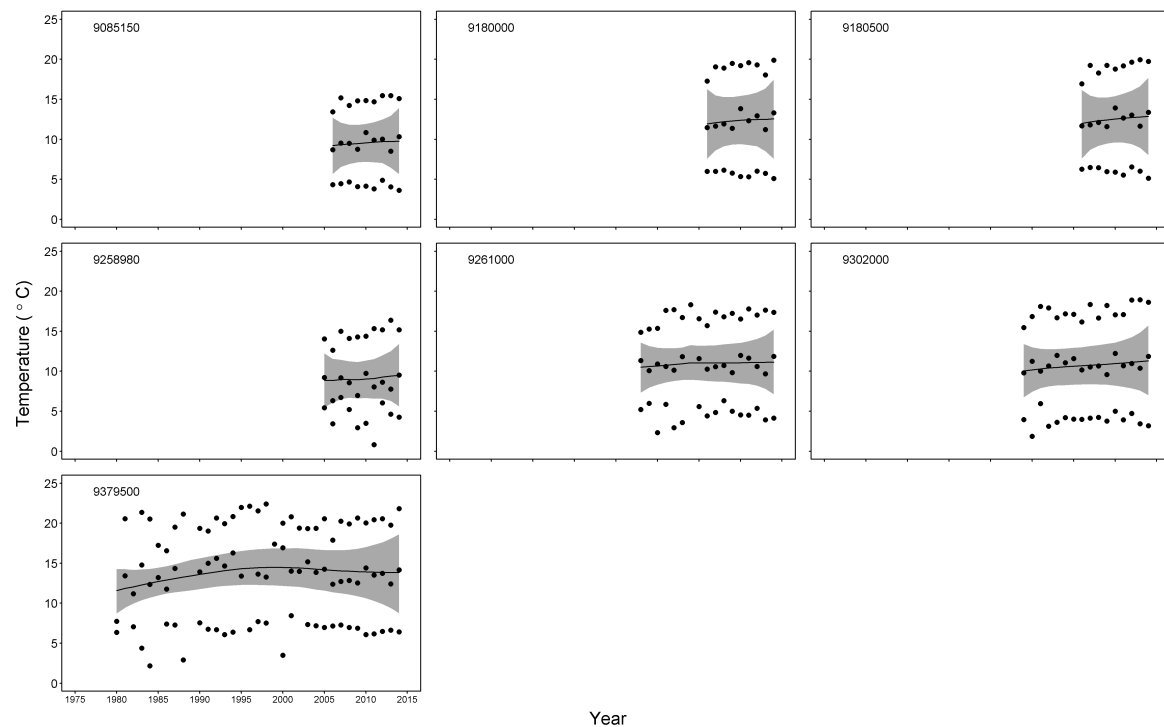

**Figure S16.** Temporal trends in fall river water temperature for sites located in the Upper Colorado River Basin (see Figure 1 for site map). Solid circles are observed data, solid lines are posterior mean fitted lines, and shaded areas are 95% credible regions. Numeric code on each panel corresponds to the U.S. Geological Survey gage ID.

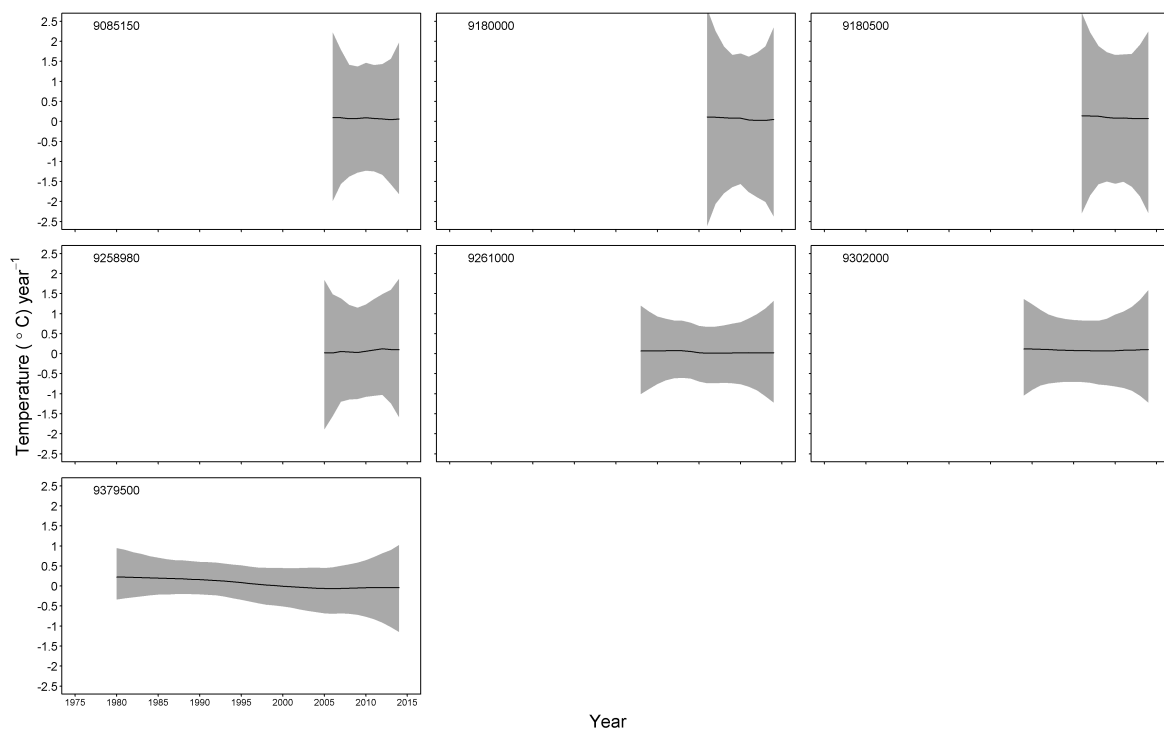

**Figure S17.** Annual rates of change in fall river water temperature for sites located in the Upper Colorado River Basin (see Figure 1 for site map). Solid solid lines are posterior means and shaded areas are 95% credible regions. Numeric code on each panel corresponds to the U.S. Geological Survey gage ID.

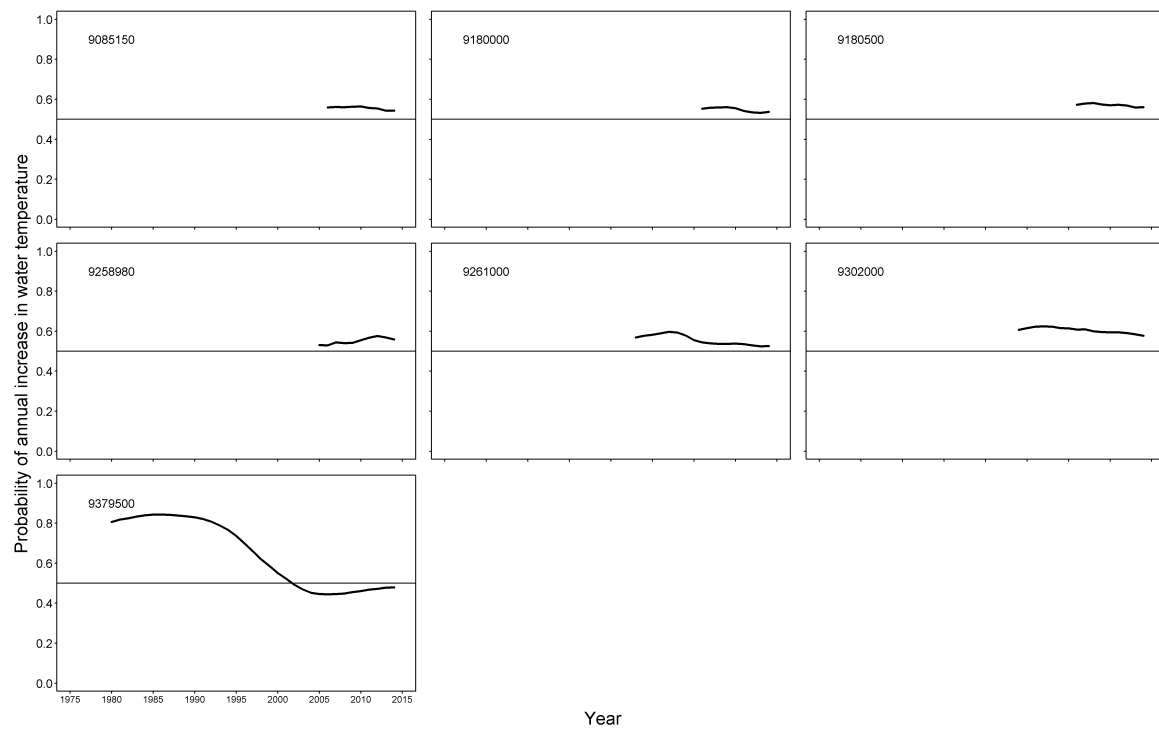

**Figure S18.** Annual probabilities of an increase in fall river water temperature for sites located in the Upper Colorado River Basin (see Figure 1 for site map). Numeric code on each panel corresponds to the U.S. Geological Survey gage ID. Horizontal line at probability = 0.5 is provided for reference.
